# Supplementary material for: Helicobacter pylori genomes reveal Paleolithic human migration to the east end of Asia
Source: PubMed Central journal article supplement — iScience. 2022 May 30;25(7):104477. doi: 10.1016/j.isci.2022.104477 (PMC9204748; doi:10.1016/j.isci.2022.104477), 2022-05-30
Supplement: mmc1.pdf [file mmc1.pdf]

**Supplemental information**

***Helicobacter pylori* genomes reveal Paleolithic  
human migration to the east end of Asia**

**Rumiko Suzuki, Naruya Saitou, Osamu Matsuari, Seiji Shiota, Takashi Matsumoto, Junko Akada, Nagisa Kinjo, Fukunori Kinjo, Kuniko Teruya, Makiko Shimoji, Akino Shiroma, Mototsugu Kato, Kazuhito Satou, Takashi Hirano, Masahiro Asaka, Kirill Kryukov, Yoshan Moodley, and Yoshio Yamaoka**

**Figure S1. Results of STRUCTURE analysis on MLST loci (no-admixture model), Related to STAR Methods**

One vertical line corresponds to one strain and the line colors represent populations whose number is designated by K. Ten runs were executed for each K and the results were integrated by CLUMPAK. The best K was 8.

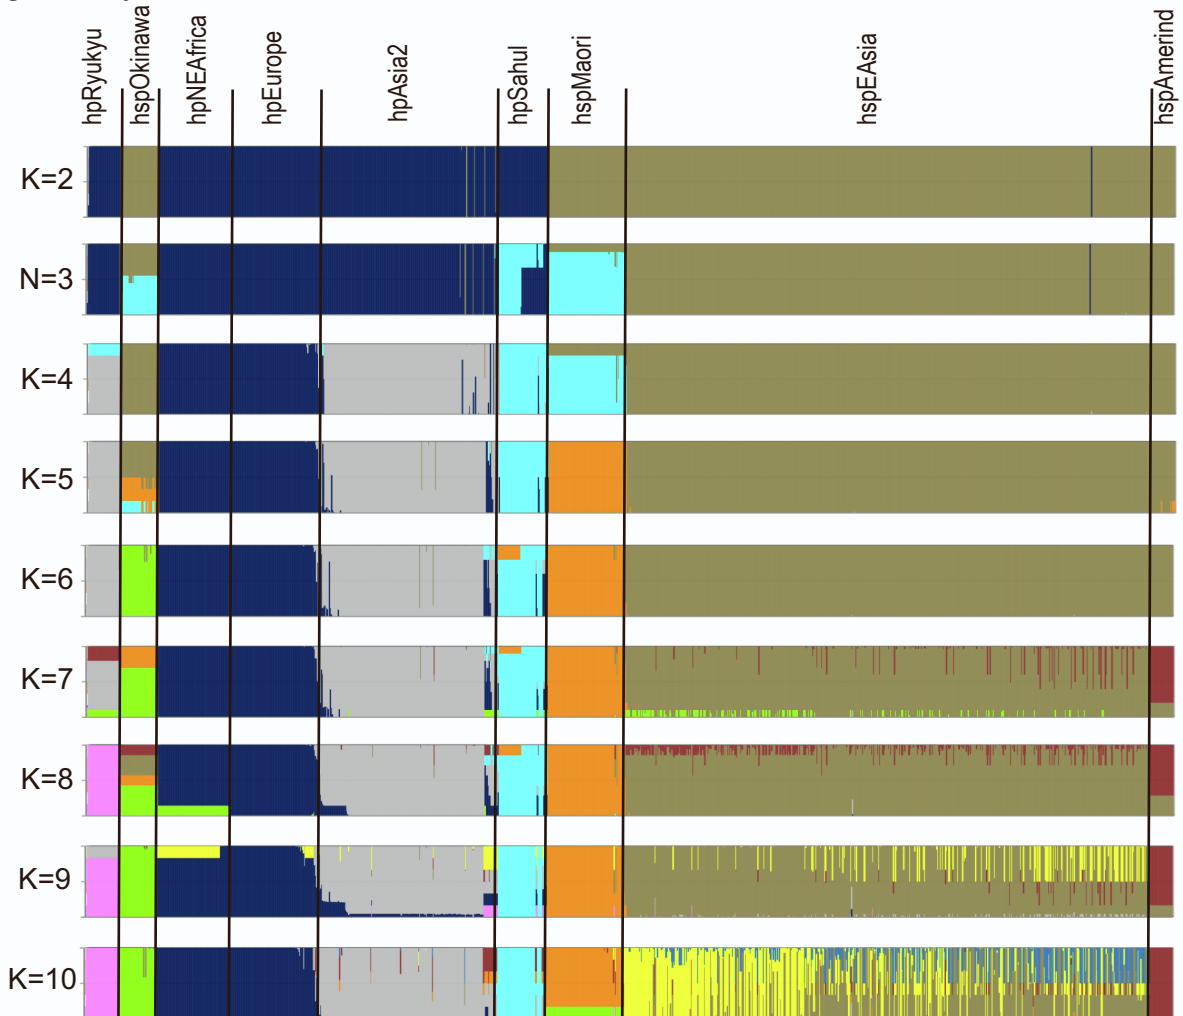

**Figure S2. Results of STRUCTURE analysis on MLST loci (no-admixture model), Related to STAR Methods**

One vertical line corresponds to one strain and line colors represent populations whose number is designated by K. Ten runs were executed for each K and the results were integrated by CLUMPAK. The ratio of colors in a line reflect the probability of belonging to that population. The best K was 8.

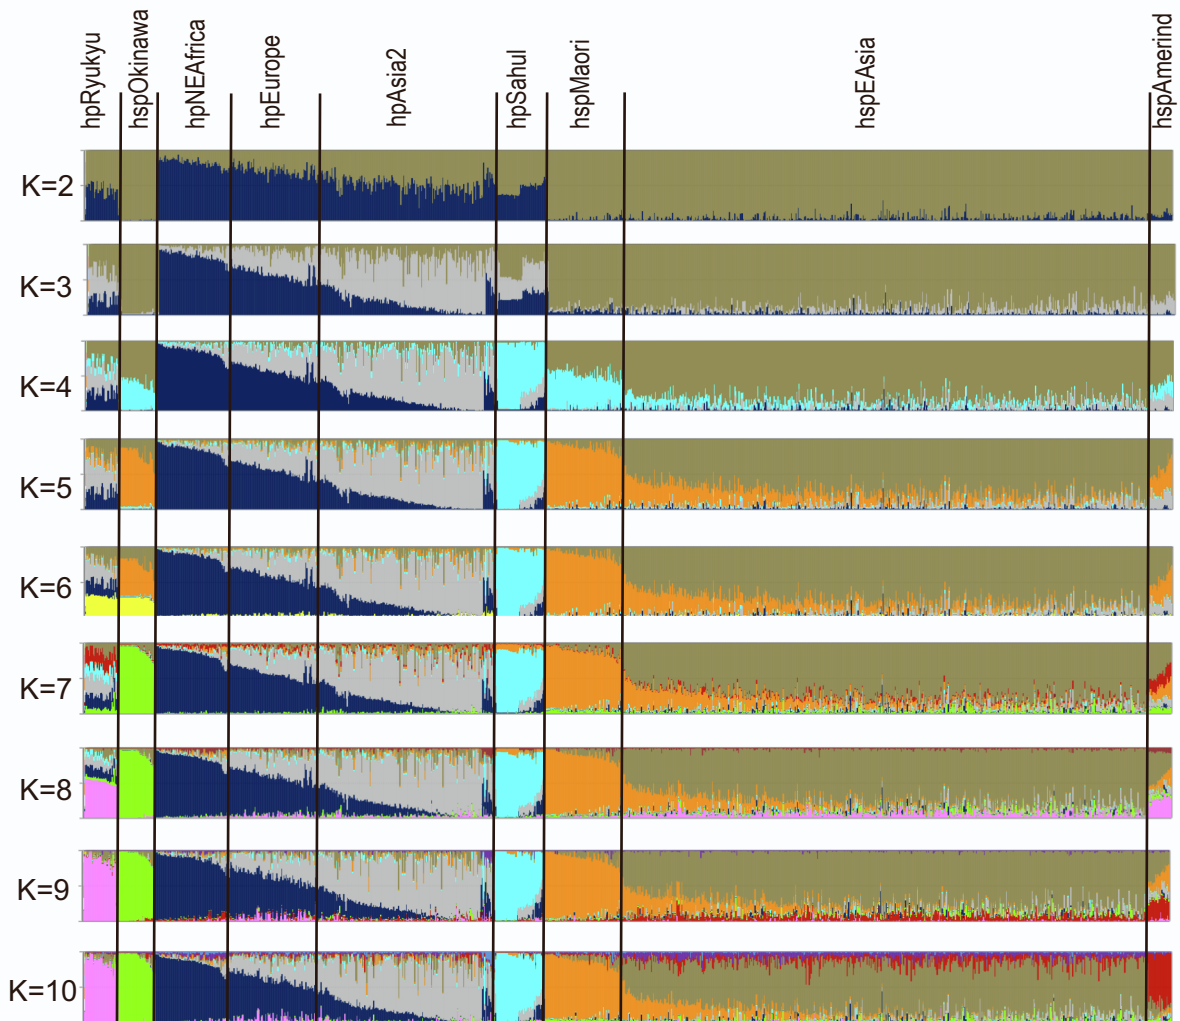

### Figure S3. Delta K of the STRUCTURE runs, Related to STAR Methods

Line graphs of Delta K drawn by STRUCTURE harvester. These graphs show that best K is 8 for both no-admixture and linkage models.

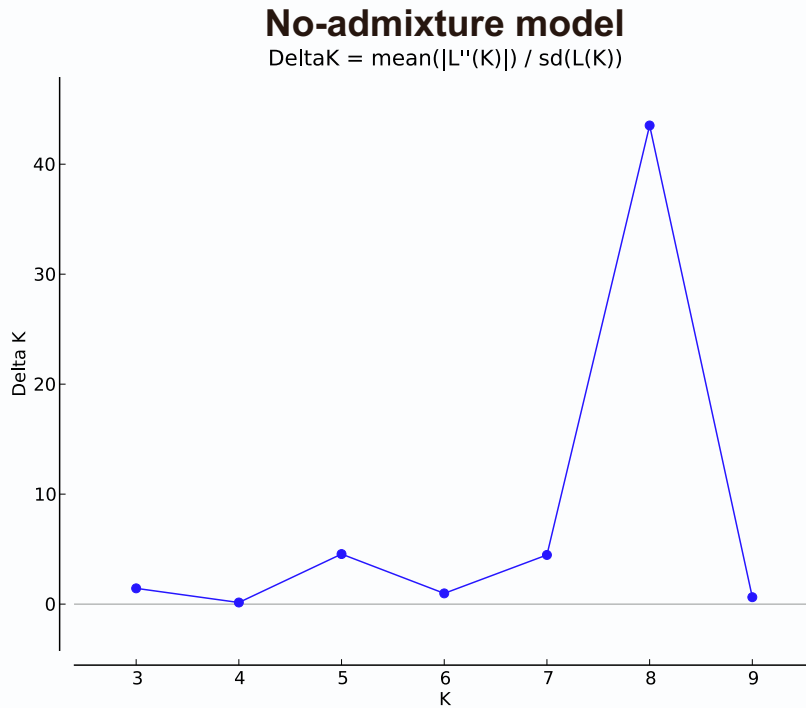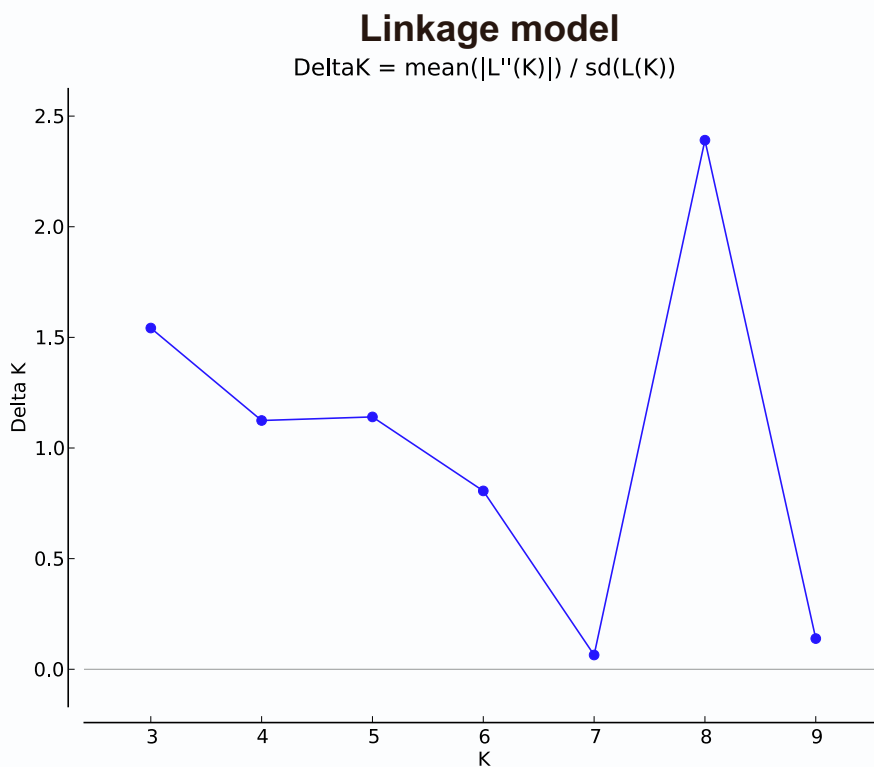

**Figure S4. DAPC (discriminated analysis of principal components) plot,  
Related to STAR Methods**

DAPC plot by the same MLST sequence data used for STRUCTURE. We set the number of clusters to 9 referring to BIC.

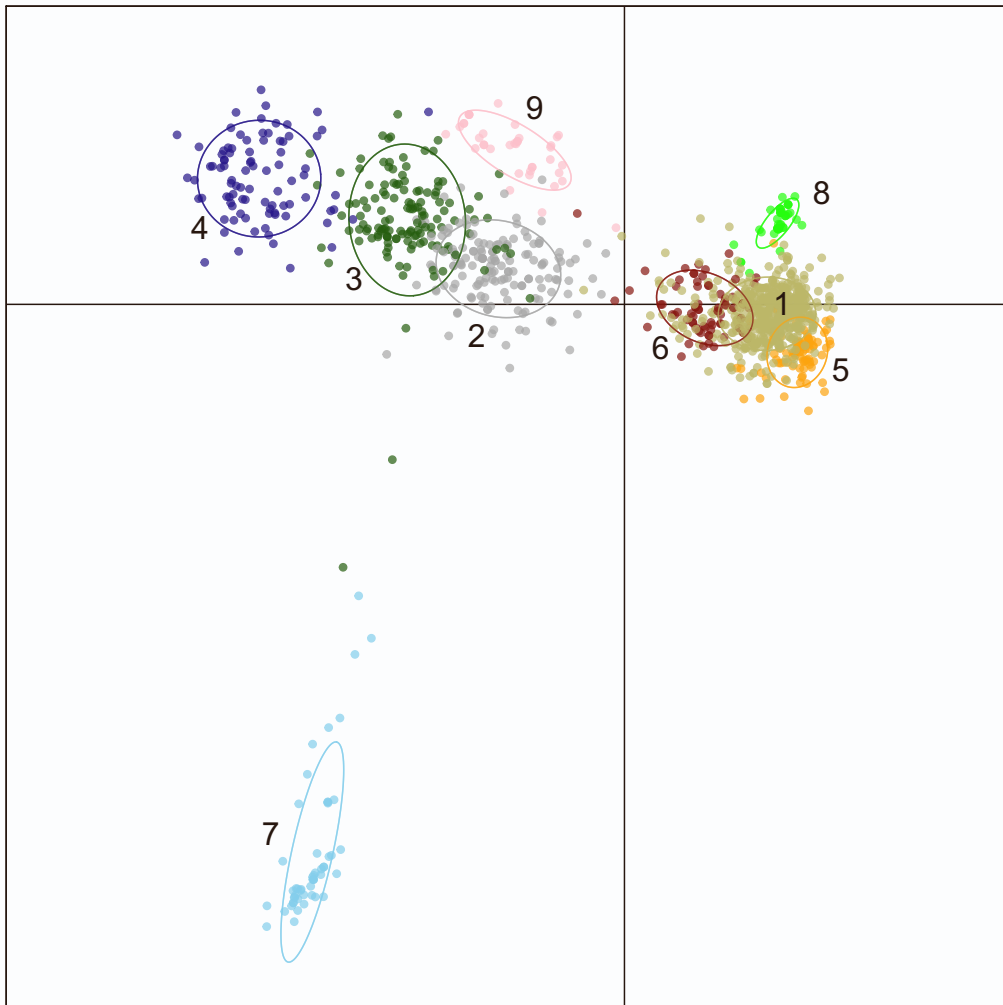

### Figure S5. DAPC and STRUCTURE, Related to STAR Methods

The bar chart shows relationship between the clustering results of DAPC and STRUCTURE.

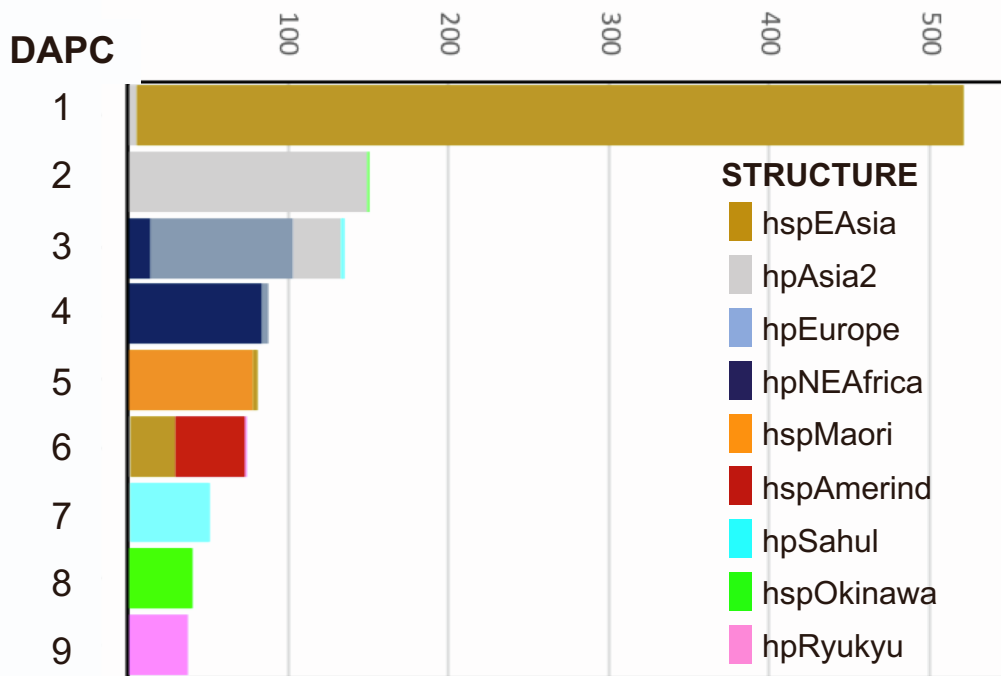







**Table S1. Sampling places and numbers of strains for the 8 clusters defined by STRUCTURE, Related to Figure 1**

| STRUCTURE  | Sampling place  | Number | STRUCTURE  | Sampling place | Number |
|------------|-----------------|--------|------------|----------------|--------|
| hpRyukyu   | Okinawa, Japan  | 35     | hspEAsia   | China          | 161    |
| hspOkinawa | Okinawa, Japan  | 37     |            | Japan          | 97     |
| hpNEAfrica | Ethiopia        | 48     |            | Thailand       | 86     |
|            | Nigeria         | 8      |            | Bhutan         | 57     |
|            | Bangladesh      | 6      |            | Taiwan         | 30     |
|            | Thailand        | 3      |            | SouthKorea     | 24     |
|            | Algeria         | 2      |            | Vietnam        | 21     |
|            | Somalia         | 2      |            | Laos           | 12     |
|            | Myanmar         | 1      |            | Singapore      | 9      |
|            | NewCaledonia    | 1      |            | Malaysia       | 8      |
|            | Taiwan          | 1      |            | India          | 6      |
| hpEurope   | Iran            | 34     |            | Cambodia       | 5      |
|            | Bangladesh      | 19     |            | Myanmar        | 4      |
|            | Thailand        | 11     |            | NewCaledonia   | 2      |
|            | Nepal           | 10     |            | France         | 1      |
|            | China           | 9      |            | Nepal          | 1      |
|            | Laos            | 4      | Peru       | 1              |        |
|            | Bhutan          | 2      | UK         | 1              |        |
|            | Myanmar         | 2      | hspAmerind | Alaska, USA    | 8      |
|            | Australia       | 1      |            | Japan          | 5      |
| Japan      | 1               | Canada |            | 4              |        |
| hpAsia2    | Thailand        | 49     |            | Colombia       | 4      |
|            | Nepal           | 40     |            | Peru           | 1      |
|            | Bangladesh      | 26     | Venezuela  | 1              |        |
|            | India           | 25     |            |                |        |
|            | Myanmar         | 13     |            |                |        |
|            | Bhutan          | 5      |            |                |        |
|            | Laos            | 5      |            |                |        |
|            | China           | 4      |            |                |        |
|            | Philippines     | 3      |            |                |        |
|            | Malaysia        | 2      |            |                |        |
|            | Australia       | 1      |            |                |        |
|            | Kazakhstan      | 1      |            |                |        |
|            | SouthAfrica     | 1      |            |                |        |
|            | The Netherlands | 1      |            |                |        |
| hpSahul    | Australia       | 25     |            |                |        |
|            | PapuaNewGuinea  | 24     |            |                |        |
| hspMaori   | Taiwan          | 37     |            |                |        |
|            | NewZealand      | 23     |            |                |        |
|            | NewCaledonia    | 13     |            |                |        |
|            | Australia       | 2      |            |                |        |
|            | Philippines     | 2      |            |                |        |
|            | Japan           | 1      |            |                |        |

**Table S2. Sampling places and numbers of strains for the 9 clusters defined by DAPC, Related to STAR Methods.**

| DAPC            | Country      | Number   |
|-----------------|--------------|----------|
| 1               | China        | 155      |
|                 | Japan        | 96       |
|                 | Thailand     | 83       |
|                 | Bhutan       | 44       |
|                 | Taiwan       | 30       |
|                 | SouthKorea   | 22       |
|                 | Vietnam      | 20       |
|                 | Laos         | 12       |
|                 | Singapore    | 9        |
|                 | Malaysia     | 8        |
|                 | India        | 7        |
|                 | Cambodia     | 5        |
|                 | Myanmar      | 5        |
|                 | France       | 1        |
|                 | Nepal        | 1        |
|                 | NewCaledonia | 1        |
|                 | Peru         | 1        |
|                 | UK           | 1        |
|                 | 2            | Thailand |
| Nepal           |              | 25       |
| Bangladesh      |              | 24       |
| India           |              | 24       |
| Myanmar         |              | 12       |
| Bhutan          |              | 4        |
| Philippines     |              | 3        |
| Malaysia        |              | 2        |
| China           |              | 1        |
| Kazakhstan      |              | 1        |
| Laos            |              | 1        |
| SouthAfrica     |              | 1        |
| The Netherlands |              | 1        |
| 3               | Iran         | 34       |
|                 | Nepal        | 23       |
|                 | Bangladesh   | 19       |
|                 | Thailand     | 13       |
|                 | China        | 10       |
|                 | Laos         | 7        |
|                 | Bhutan       | 3        |
|                 | Myanmar      | 3        |
|                 | Australia    | 2        |
|                 | Japan        | 1        |

| DAPC         | Country        | Number |
|--------------|----------------|--------|
| 4            | Ethiopia       | 48     |
|              | Bangladesh     | 8      |
|              | Nigeria        | 8      |
|              | Thailand       | 3      |
|              | Algeria        | 2      |
|              | Nepal          | 2      |
|              | Somalia        | 2      |
|              | NewCaledonia   | 1      |
|              | Taiwan         | 1      |
|              | 5              | Taiwan |
| NewZealand   |                | 23     |
| NewCaledonia |                | 13     |
| Australia    |                | 2      |
| Philippines  |                | 2      |
| Thailand     |                | 2      |
| Japan        |                | 1      |
| Laos         |                | 1      |
| 6            | Bhutan         | 13     |
|              | China          | 8      |
|              | Alaska, USA    | 8      |
|              | Japan          | 6      |
|              | Canada         | 4      |
|              | Colombia       | 4      |
| 6            | SouthKorea     | 2      |
|              | Thailand       | 2      |
|              | NewCaledonia   | 1      |
|              | Okinawa, Japan | 1      |
|              | Peru           | 1      |
|              | Venezuela      | 1      |
|              | Vietnam        | 1      |
| 7            | Australia      | 25     |
|              | PapuaNewGuinea | 24     |
| 8            | Okinawa, Japan | 37     |
| 9            | Okinawa, Japan | 34     |

**Table S3. Helicobacter pylori genomes we added in this study, Related to Figure 1.**

| Name     | Location        | Accession number | Genome size (bp) | GC%   |
|----------|-----------------|------------------|------------------|-------|
| AL02     | Alaska, USA     | CP058250         | 1,575,789        | 39.11 |
| AL03     | Alaska, USA     | CP058288         | 1,652,551        | 38.71 |
| AL04     | Alaska, USA     | CP058287         | 1,639,336        | 38.75 |
| AL05     | Alaska, USA     | CP058286         | 1,621,023        | 38.94 |
| BT302    | Bhutan          | CP058285         | 1,619,269        | 38.91 |
| CO1681   | Colombia        | CP058284         | 1,531,394        | 39.12 |
| CO1766   | Colombia        | CP058283         | 1,633,485        | 38.84 |
| CO1768   | Colombia        | CP058282         | 1,622,089        | 38.98 |
| Hk711    | Hokkaido, Japan | CP058281         | 1,687,334        | 38.64 |
| Hk721    | Hokkaido, Japan | CP058280         | 1,645,786        | 38.9  |
| Hk840    | Hokkaido, Japan | CP058279         | 1,622,038        | 38.79 |
| NP05-124 | Nepal           | CP058252         | 1,639,844        | 38.84 |
| oki102   | Okinawa, Japan  | CP006820         | 1,633,212        | 38.81 |
| oki112   | Okinawa, Japan  | CP006821         | 1,637,925        | 38.81 |
| oki128   | Okinawa, Japan  | CP006822         | 1,553,826        | 38.97 |
| oki154   | Okinawa, Japan  | CP006823         | 1,599,700        | 38.8  |
| oki422   | Okinawa, Japan  | CP006824         | 1,634,852        | 38.83 |
| oki673   | Okinawa, Japan  | CP006825         | 1,595,058        | 38.92 |
| oki828   | Okinawa, Japan  | CP006826         | 1,600,345        | 38.8  |
| oki898   | Okinawa, Japan  | CP006827         | 1,634,875        | 38.83 |
| UBN18    | Thailand        | CP058251         | 1,656,897        | 38.78 |
